1 **Classification: BIOLOGICAL SCIENCES; Population biology**

2

3 **Title: Population structure in Arctic marine forests is shaped by diverse recolonisation**  
4 **pathways and far northern glacial refugia**

5

6 **Authors**

7 Trevor T. Bringloe<sup>1,2\*</sup>, Heroen Verbruggen<sup>2</sup>, Gary W. Saunders<sup>1</sup>.

8

9 **Affiliations**

10 <sup>1</sup>Centre for Environmental and Molecular Algal Research (CEMAR), Biology Department,  
11 University of New Brunswick, P.O. Box 4400, Fredericton, New Brunswick, Canada, E3B 5A3.

12 <sup>2</sup>School of BioSciences, University of Melbourne, Parkville Campus, Victoria, Australia, 3010.

13

14 **\*Corresponding Author:** Trevor Bringloe, School of BioSciences, University of Melbourne,  
15 Parkville Campus, Victoria, Australia, 3010, +61 0480-126-796,

16 [trevor.bringloe@unimelb.edu.au](mailto:trevor.bringloe@unimelb.edu.au)

17

18 **Keywords**

19 Pleistocene glaciation, Species Distribution Models, Genetics

## 20 **Abstract**

21 The Arctic is experiencing a rapid shift towards warmer regimes, calling for a need to understand  
22 levels of biodiversity and ecosystem responses to climate cycles. This study examines marine  
23 refugial locations during the Last Glacial Maximum in order to link recolonization pathways to  
24 patterns of genetic diversity in Arctic marine forests. We present genetic data for 109 species of  
25 seaweed to infer community-level patterns, and hindcast species distributions during the Last  
26 Glacial Maximum to further pinpoint likely refugial locations. Sequence data revealed  
27 contiguous populations extending from the Bering Sea to the Northwest Atlantic, with high  
28 levels of genetic diversity in the East Canadian Arctic. One fifth of the species sampled appeared  
29 restricted to Arctic waters. Hindcasted species distributions highlighted refugia in the Bering  
30 Sea, Northwest Atlantic, South Greenland, and Europe. We hypothesize that Arctic coastal  
31 systems were recolonized from many geographically disparate refugia leading to enriched  
32 diversity levels in the East Canadian Arctic, with important contributions stemming from  
33 northerly refugia likely centered along Southern Greenland. Moreover, we hypothesize these  
34 northerly refugia likely played a key role in promoting polar endemic diversity, as reflected by  
35 abundant unique population haplotypes and endemic species in the East Arctic.

## 36 **Significance Statement**

37 Our work challenges the existing paradigm that marine Arctic ecosystems are depauperate  
38 extensions of southerly (temperate) communities established in the wake of recent glaciation,  
39 fundamentally changing how these systems should be viewed and interpreted. We forward novel  
40 hypotheses regarding the recent history of Arctic marine systems, particularly with regards to  
41 endemism being an integral feature of Arctic biomes, and present a firm framework for future  
42 evolutionary research in this system typically viewed as “ecologically immature.”

## 43 **MAIN TEXT**

### 44 **Introduction**

45 The Arctic is characterized by a turbulent climatic history and the prospect of further  
46 change. Repeated glaciations over the past 2.6 Ma had a lasting impact on biological  
47 communities, forcing populations to repeatedly contract and expand with the formation and  
48 retreat of ice-sheets (1). Today, warming in the Arctic is significantly exceeding the Northern  
49 Hemisphere average, and boreal and temperate regimes are expected to shift northwards as a  
50 result (2). A prescient need exists to understand the responses of Arctic marine communities to  
51 climate change, a need that will inherently depend on understanding levels of biodiversity, the  
52 recent history of Arctic ecosystems, and ultimately the potential for adaptation.

53 Marine forests are a model system for providing such insight on Arctic marine  
54 communities. Marine forests are structurally complex seascapes created by seaweeds, are  
55 ubiquitous worldwide, and provide valuable ecosystem and economic services in the forms of  
56 habitat, nursery grounds, primary productivity, and harvesting resources (3). Marine forests may  
57 also sequester large amounts of carbon (4), giving them a potent role in ocean-based climate  
58 change mitigation (5). Arctic marine forests are broadly distributed, with circumpolar species  
59 distributions extending from the Pacific through to the Atlantic with large gaps along the  
60 Siberian Arctic coastline owing to unsuitable soft substrate (6) (see Fig. S1 for exemplar  
61 species). Marine forests in the Arctic can also grow to incredible depths in some locations,  
62  
63  
64  
65

66 particularly off the coasts of Greenland and Svalbard where macroalgae have been recorded as  
67 deep as 60 m (7). Annual ice cover is often a limiting factor in the Arctic, preventing a lush  
68 intertidal community from flourishing, but nonetheless allowing annuals and hardier flora to take  
69 advantage of the short growing season (6). Some species are particularly resilient to these  
70 conditions. The kelp *Laminaria solidungula*, for instance, completes nearly all its growth under  
71 ice, using the summer months when photosynthetic rate is high to focus exclusively on carbon  
72 capture and storage (8).

73

74 The presence of species that are finely tuned to marine Arctic conditions raises an  
75 interesting paradox, in that Arctic marine forests were historically viewed as entirely derived  
76 from southerly European refugia following the Last Glacial Maximum (LGM; 9, 10). Under this  
77 view, Arctic marine forests were regarded as an extension of cold-tolerant temperate species,  
78 precluding the notion of Arctic endemism. While the notion of survival in refugia south of ice  
79 sheets persists, alternative hypotheses regarding the recent origins of Arctic marine forests have  
80 been brought forward, emphasizing contributions from the Northern Pacific (11, 12, 13). A few  
81 genetic studies suggest there may have been multiple recolonization pathways for marine Arctic  
82 communities, and have also revealed cryptic diversity in the Arctic, reviving the notion of Arctic  
83 endemism (11, 14, 15). Being foundational to coastal ecosystems, such novel insight derived  
84 from Arctic marine forests likely apply across a wide range of taxa, and have the potential to  
85 dramatically shift how we view and interpret biodiversity and recent origins in Arctic marine  
86 communities, along with their potential to adapt to ongoing climatic changes.

87

88 The notion of Arctic marine forests as a depauperate extension of temperate communities  
89 is an antiquated view. Genetic signature at odds with the hypothesis of recolonization  
90 predominantly out of European refugia and the presence of cryptic diversity in the Arctic  
91 challenge researchers to revise our understanding of Arctic marine forests and how they persist  
92 through cycles of glaciation. Our objective was to clarify the recent origin of Arctic marine  
93 forests, emphasizing a community-level approach by summarizing genetic data results across  
94 many species, and using species distribution models to identify likely refugial locations during  
95 the LGM. We evaluated several hypotheses, employing two lines of evidence in the forms of  
96 genetic surveys (DNA barcoding) and hindcasting species distributions using ecological niche  
97 modelling. If Arctic marine populations were recently recolonized from southerly refugia,  
98 particularly from Europe, then we should observe a decline in genetic diversity along the  
99 recolonization pathway (east to west and south to north). In addition, recolonized areas should be  
100 genetically closer to the source basin as compared to conspecifics in alternate basins owing to  
101 vicariance during glaciation (i.e. Atlantic vs Pacific). Finally, if refugia were only available in  
102 Europe, then hindcasting species distributions should reflect this, that is areas of likely species  
103 occurrences lacking persistent ice cover during the LGM should be restricted to Europe. If these  
104 hypotheses are rejected, our approach will otherwise yield insight on alternate locations of  
105 persistence and the subsequent dynamics of recolonization following glaciation.

106

## 107 **Results**

### 108 *Analysis of sequence data*

109 In order to infer refugial locations and recolonization pathways in Arctic marine forest  
110 assemblages, we surveyed and sequenced DNA barcode markers in specimens from several  
111 areas. For analytical purposes, we pooled specimens according to the following geographic

112 distinctions: the Northeast Pacific (British Columbia, Canada, and Washington state, USA);  
113 Nome, Bering Sea, Alaska (proxy for Pacific migrants into the Arctic); Beaufort, Arctic Ocean,  
114 Alaska (proxy for the West North American Arctic); East Canadian Arctic (Cambridge Bay,  
115 Nunavut, through to Nain, Labrador); Northwest Atlantic (Makkovik, Labrador, and southwards,  
116 including the Canadian Atlantic provinces and New England States, USA); and the Northeast  
117 Atlantic (Europe). In total, 4631 specimen records were amalgamated, 2018 of which were  
118 collected during this study (2014-2018), representing 42 species of red algae, 49 brown algae,  
119 and 18 green algae, for a total of 109 marine macroalgal species with Arctic populations. Of  
120 these, 21 species (19%) were sampled exclusively within the Arctic basin, predominantly from  
121 the East Arctic region (Table S1; Fig. S2). The genetic results averaged across 31 species-marker  
122 combinations revealed Arctic populations that were typically distinct from conspecifics in the  
123 Northeast Atlantic and Northeast Pacific. A Principal Coordinates Analysis (PCoA) of genetic  
124 distances grouped populations extending from the Bering Sea through to the Northwest Atlantic,  
125 within which the East Arctic fell in the middle (Table 1, Fig. 1). Northeast Pacific and Northwest  
126 Atlantic populations featured greater genetic diversity, in contrast to comparable populations in  
127 Europe, while genetic diversity was depleted in Nome populations and was lowest in the  
128 Beaufort (Table 2). The East Arctic, on the other hand, featured levels of genetic diversity  
129 comparable to the Northwest Atlantic and Northeast Pacific (Table 2). Interestingly, private  
130 haplotypes were detected in all the regions, with the lowest occurrences in the Beaufort. Tajima's  
131 D was negative in southerly populations (Northeast Pacific, Northwest Atlantic, and Northeast  
132 Atlantic), and was 0 on average for northern populations (Nome, Beaufort, East Arctic). Of the  
133 variables analysed, significant differences were detected across the regions in the number of  
134 polymorphic sites, the number of haplotypes, the number of private haplotypes, and Tajima's D,  
135 generally corresponding to large differences in values between the Beaufort and the Northwest  
136 Atlantic. Post hoc tests, however, were unable to detect differences between specific regions  
137 (Table S2).

138  
139 The presence of private haplotypes in Arctic populations was further highlighted in the  
140 haplotype distributions of some species, particularly in the East Arctic. Noteworthy examples  
141 included *Alaria esculenta* (Fig. S44 and S45), *Devaleraea ramentacea* (Figs. S13 and S14),  
142 *Rhodomela* sp. 1virgata (Fig. S36), and *Pylaiella washingtoniensis* (Fig. S74). Some species  
143 showed signs of admixture between North Pacific and North Atlantic populations, particularly in  
144 Churchill (Hudson Bay) and Northern Labrador (Northwest Atlantic); these species included  
145 *Coccotylus truncatus* (Fig. S12), *Eudesme borealis* (Fig. S58), *Saccharina latissima* (Fig. S76),  
146 *Scagelia pylaisaei* (Fig. S39), and possibly *Chaetopteris plumosa* (Fig. S49) and *Phycodryx*  
147 *fimbriata* (Fig. S26). As well, the genetic makeup of several species populations in the Beaufort  
148 was markedly different from conspecifics in Nome (Tables 1, 2; Fig. 1), including *Coccotylus*  
149 *truncatus* (Fig. S11 and S12), *Odonthalia dentata* (Fig. S23), *Phycodryx fimbriata* (Fig. S26),  
150 and *Rhodomela sibirica* (Figs. S34 and S35).

151  
152 *Hindcasting species distributions during the Last Glacial Maximum*

153 In order to further pinpoint marine refugial locations, we used species distribution models  
154 to hindcast the availability of suitable habitat during the LGM. Hindcasting results differed  
155 between Arctic endemic marine forest species (as proxied by the kelp *Laminaria solidungula*)  
156 and cold-temperate species ranging into the Arctic (as proxied by the red alga *Odonthalia*  
157 *dentata*). Cold-temperate species featured a present-day circumpolar distribution with large areas

158 of probable occurrence in the North Pacific and North Atlantic. Projections during the LGM  
159 similarly indicated areas of probable occurrence throughout the Pacific and Atlantic basins,  
160 though highly reduced in total area compared to the present-day projection and particularly  
161 limited in South Greenland and the Northwest Atlantic (Fig. 2). Areas of probable occurrence for  
162 Arctic endemics for both time projections were more northerly as compared to cold-temperate  
163 species, with clear areas of probable occurrence projected in Southern Greenland during the  
164 LGM.

165

## 166 **Discussion**

### 167 *Recolonization of the Arctic via multiple refugial nuclei*

168 Our understanding of biodiversity patterns in Arctic marine forests has lagged compared  
169 to marine animals. The reported similarity of Arctic marine floral assemblages to Atlantic  
170 communities was an observation historically at odds with the Pacific origins inferred in Arctic  
171 marine fauna, particularly in the Western Arctic (10). Besides noting the “paradox of marine  
172 benthic fauna and flora,” Dunton (10) also predicted the importance of molecular data in  
173 resolving such disjunct perspectives. Today, with over 4500 sequence records for more than 100  
174 species, the increased fidelity to resolve historical events in populations of Arctic marine forests  
175 can shed light on not just recent origins, but also the potential for evolution and northern  
176 adaptation in Arctic marine communities.

177

178 The results presented here reject the hypothesis that Arctic marine forests are entirely or  
179 predominantly derived from European conspecifics (9, 10). This was first evident in the genetic  
180 distances, which indicated a series of populations extending from the Northwest Atlantic through  
181 to the Northern Bering Sea distinct from the Northeast Atlantic and Northeast Pacific (Fig. 1,  
182 Table 1). Furthermore, a decline in diversity from the Atlantic into the Arctic was not evident,  
183 which ought to occur in the wake of recolonization (Table 2). In fact, levels of diversity were  
184 typically highest in the Northwest Atlantic and maintained in the East Arctic, and Tajima’s D test  
185 suggested a general trend towards population expansion in the Northwest Atlantic, consistent  
186 with the presence of refugia (Table 2, Table S3). Hindcasting also showcased areas of probable  
187 occurrence during the LGM in the Bering Sea, Southern Greenland, Northwest Atlantic (though  
188 highly limited), in addition to Europe (Fig. 2). Finally, haplotype patterns in several species  
189 presented here strongly imply the presence of multiple refugia in the Northwest Atlantic (e.g.  
190 *Ceramium virgatum*; Fig. S6).

191

192 Clearly the European recolonization hypothesis, stemming from a legacy of  
193 morphological identifications and the persistent perception of inhospitable glacial conditions in  
194 the Northwest Atlantic (9, 10), can be put to rest. For one, refugia in the Northwest Atlantic have  
195 been increasingly recognized, downplaying the importance of postglacial recolonization from  
196 European refugia (2, 16, 17). Trans-Atlantic populations of marine flora also typically exhibit  
197 genetic divergence, corresponding to isolation events during the Pleistocene, further supporting  
198 the notion that an abundant marine flora was available to recolonize the Arctic out of the  
199 Northwest Atlantic (18). Assis *et al.* (2) also used ecological niche modelling to hindcast kelp  
200 distributions during the LGM, which suggested several species likely survived glaciation in the  
201 Northwest Atlantic, a result further supported in the hindcasting results presented here (Fig. 2).  
202 Other modelling work indicated Arctic and sub-Arctic Atlantic marine forests have evolutionary  
203 origins in the North Pacific owing to Pleistocene climate and geography, suggesting recurring



204 recolonization occurred out of the Pacific (though not necessarily clarifying origins since the  
205 LGM; 13).

206

207 Rather, the emerging story of Arctic marine recolonization is more nuanced than  
208 anticipated, even in more recent studies. Pacific origins to Arctic flora since the LGM have been  
209 speculated in the past (6, 9), interpreted in more recent reviews of floristic surveys (19), and  
210 increasingly inferred by molecular data (11; 12). Molecular work has been slow to recognize the  
211 significance of unique Arctic lineages that are difficult to reconcile with the emphasis on  
212 recolonization hypotheses stemming from refugia south of continental ice-sheets. For instance,  
213 Neiva *et al.* (12) attribute an Arctic phylogroup of *Saccharina latissima* restricted to the  
214 Canadian Arctic and Western Greenland to unsampled Bering Sea populations, and consistently  
215 reveal northern or “cold” phylogroups across the species range. The hesitation to consider  
216 northern refugia as a possible explanation (e.g. Southern Greenland) likely stems from several  
217 sources, including a lack of comprehensive geographic coverage in genetic sampling, limited  
218 insight from single species, and confusion regarding the extent of seasonal ice cover during the  
219 LGM. Here, the position of East Arctic genetic distances between populations sampled in the  
220 Bering Sea and Northwest Atlantic (Fig. 1) and sustained levels of genetic diversity in East  
221 Arctic populations (Table 2) can be attributed to a combination of admixture between Pacific and  
222 Atlantic populations and vicariance, the latter of which invoke the presence of high northern  
223 refugia. Hindcasting identified the most likely area of occurrence for these refugia along the  
224 coastlines of Southern Greenland where ice cover was seasonal during the LGM (Fig. 2; 20),  
225 particularly in species specifically outfitted to thrive in Arctic conditions (e.g. *Laminaria*  
226 *solidungula*). It is worth noting hindcasting results are consistent with the work of Assis *et al.*  
227 (2), though these authors also inferred high Arctic refugia in areas we identified as having  
228 persistent ice cover (namely Baffin Island and Northern Labrador). In sum, the origin of Arctic  
229 marine forests, as revealed by our community level analysis, forwards the West Arctic as likely  
230 derived from Bering Sea refugia, while the East Canadian Arctic exhibits a “melting pot”  
231 character, with input from the Pacific, the Atlantic (predominantly the Northwest), and Arctic  
232 refugia.

233

#### 234 *High northern refugia drive Arctic endemism*

235 The conclusion that refugia were abundant and occurred far north offers an explanation  
236 for marine Arctic endemism, which is generally assumed to be rare or impossible given the  
237 perception of intolerable ice conditions during the LGM. Lee (9) suggested less than 7% of the  
238 Arctic flora was confined to the Arctic and perceived low levels of adaptation, characterizing the  
239 flora as “ecologically immature.” More recent estimates bump up the level of Arctic endemism  
240 to 13.5% (21). Molecular taxonomic work reflects the trend towards recognizing Arctic  
241 affinities, for example, in the recently described species *Ahnfeltia borealis*, *Chorda borealis*, and  
242 *Eudesme borealis* (22). Here, 21 species (19%) of the sampled flora appeared to be confined to  
243 the Arctic, not to mention the cryptic lineages reported by Laughinghouse *et al.* (14), Küpper *et*  
244 *al.* (15), and species with distinct Arctic populations reported here (e.g. *Alaria esculenta*; Fig.  
245 S45 and S46). Altogether, these results suggest that a large portion of the Arctic flora has  
246 persisted far north through cycles of glaciation, raising the possibility that Arctic marine forests  
247 do not simply tolerate but rather are adapted to polar conditions.

248

249 The implications of these findings extend beyond marine forests. Patterns in  
250 accompanying hard-bottom marine fauna, some of which thrive in the habitat provided by  
251 macroalgae, are readily resolved by invoking northern refugia. A phylogeographic review of  
252 Arctic marine fauna highlighted substantial geographical subdivision in the COI-5P complex of  
253 the polychaete *Harmothoe imbricata*, with lineages that appeared to be restricted to the East  
254 Canadian Arctic (23). The presence of cryptic Arctic lineages was further revealed in  
255 polychaetes (24), molluscs (25) and amphipods (26). In concert with the results for Arctic  
256 forests, these studies demonstrate the resilience of Arctic marine communities to cycles of  
257 glaciation and the potential for adaptation to extreme-cold environments. Given the relative  
258 scarcity of genetic surveys in the Arctic, these results also suggest levels of Arctic marine  
259 endemism remain underestimated, a disparity that is likely further exacerbated at the population  
260 level.

261  
262 On a final note, it is possible northern refugia are not confined to the Southern coast of  
263 Greenland. Though the Western Arctic was locked in multi-year sea ice, portions of the Siberian  
264 coastline as far east as the Laptev Sea appear to have remained seasonally ice-free at least as  
265 early as 16 ka (27). This was due to warm Atlantic water entering the Arctic through the Fram  
266 Strait, which may have provided Arctic refuge for marine forests. The role of katabatic winds  
267 and the formation of polynyas, recurrent areas of ice-free water, also may have played a role  
268 maintaining a seasonally ice-free shoreline (27). The modern day Arctic features numerous  
269 polynyas, particularly along the margins of the Arctic basin, enhancing early spring productivity  
270 and creating biodiversity hotspots (28). Lee (9) even describes seaweed communities in a  
271 polynya near Brock island (78°N), including *Laminaria solidungula*, *Desmarestia viridis*, and  
272 *Turnerella pennyi*. Hypotheses regarding the role of polynyas maintaining Arctic refugial  
273 locations during the LGM may need to be invoked to explain the population structure of the  
274 Beaufort, which is oddly more genetically distant from Atlantic conspecifics than Nome  
275 populations (which are geographically further away, Fig. 1). We do caution in interpreting this  
276 pattern, however, given the limited sampling of the West Arctic/Bering Sea, lack of sampling  
277 from Russia, and “founder-takes-all” effects, which can result in sharp demarcations in  
278 macroalgal population structure, even at small spatial scales (29). Even so, if history is an  
279 indication, we need to temper our assumptions regarding the inability for marine forests to  
280 flourish in areas with “harsh” ice conditions.

## 281 282 *Conclusions*

283 Over the decades, our understanding of Arctic marine forests has gradually evolved from  
284 a one-vector ecosystem stemming from European refugia to many melding pathways, and from a  
285 biologically depauperate expanse into a complex genetic landscape. Ultimately, our goal was to  
286 provide a checkpoint in our understanding of Arctic marine diversity, particularly by sampling  
287 Arctic locations where DNA barcode surveys are rare or absent (i.e. Bering Sea, East Arctic,  
288 Northern Europe) and by summarizing genetic patterns across macroalgal species with sequence  
289 data from the Arctic. We emphasize the significance of summarizing insight across species, with  
290 over 100 examined through this work spanning three phyla and two kingdoms of life, and  
291 extensively so in 26 (Table S1; Fig. S1). Single-species studies have struggled to reconcile post-  
292 glacial dynamics, particularly where findings do not align with prevailing views (e.g. 12, 14). As  
293 well, a population genetic approach to resolving these patterns in Arctic marine communities  
294 oftentimes falls short of conclusive owing the inherent difficulty in sampling any individual

295 location and subsequent limited geographical coverage for analysis. Ecological niche modelling  
296 can close these gaps in our knowledge by highlighting likely locations of persistence during  
297 glaciation and aiding in the interpretation of genetic patterns.  
298

299 We forward the view that the marine Arctic environment was recolonized from numerous  
300 and globally distributed source populations, including unrecognized far northern refugia that  
301 additionally contribute to endemism in polar waters. This work raises the possibility of  
302 investigating complex evolutionary processes born out of the Arctic environment, particularly  
303 the interplay between incipient speciation and secondary contact, and adaptation to the marine  
304 Arctic environment. Ecosystem management will need to acknowledge diversity endemic to the  
305 Arctic and the potential impacts of climate change on these populations. Future work should  
306 emphasize sampling in Russia where DNA barcodes are virtually absent, and Southern  
307 Greenland as a putative refugial location. A consensus must also be reached regarding the extent  
308 of persistent sea ice cover during the LGM, and what role, if any, continental ice-sheets had in  
309 extirpating marine populations. As well, given the range of challenges and limited opportunity to  
310 sample the marine Arctic environment, future collectors should consider sampling protocols  
311 amendable to downstream genomic analyses, whatever the primary purpose for Arctic fieldwork.  
312 The DNA barcode surveys presented here are a checkpoint towards the genomic era of Arctic  
313 investigations, a realm that will certainly reveal novel and exciting insight into levels of  
314 biodiversity in the Arctic, and potential for further adaptation and evolution in a changing  
315 climate.  
316

## 317 **Materials and Methods**

### 318 *Genetic data and analyses*

319 Marine macroalgae were sampled in several key locations across the Arctic over the  
320 course of five years, including Japan; Kamchatka (Russia); Haida Gwaii, British Columbia,  
321 Canada; Nome, Alaska (Northern Bering Sea); the Beaufort Sea, Northern Alaska; Cambridge  
322 Bay (Nunavut, Canada); Hudson Bay, Manitoba, Canada; Baffin Island, through Northern  
323 Labrador to Makkovik, Canada; and Bergen, Norway. Specimen records, including pictures,  
324 collection information, sequence data, and GenBank accessions can be accessed via the Barcode  
325 of Life Data System (BOLD; doi: [dx.doi.org/10.5883/DS-TAMMA](https://dx.doi.org/10.5883/DS-TAMMA)) and FigShare:  
326 (<https://doi.org/10.6084/m9.figshare.11301929.v1>). Marine macroalgae were generally collected  
327 from the intertidal and via scuba, but occasionally via dredge. A portion of each specimen  
328 (approx. 1 cm<sup>2</sup>) was preserved in silica gel for DNA extraction, while several representatives of  
329 putative species were preserved as pressed vouchers. Specimens were brought back to the  
330 University of New Brunswick (where specimens are stored) for DNA extraction. Several genes  
331 were amplified, including the 5' end of the cytochrome *c* oxidase subunit I gene (COI-5P) in red  
332 and brown algae, *tufA* in green algae, and partial reads of the ribulose-1, 5-biphosphate  
333 carboxylase large subunit (*rbcL*-3P; Table S4) in red and brown algae. Secondary markers were  
334 acquired in select species, including the full length nuclear internal transcribed spacer region  
335 (ITS) and plastid *ycf35*, in order to further clarify or support COI-5P patterns (Table S4).  
336 Successful PCR products were sent to Genome Quebec for forward and reverse sequencing. All  
337 genetic data were edited in Geneious v.8.0 (30), and any relevant previously published DNA  
338 barcodes were added to the dataset.  
339  
340



341 Populations were pooled for analysis according to broad geographic regions: Northeast  
342 Pacific (British Columbia, Canada, and Washington state, USA); Nome, Alaska (proxy for  
343 Pacific migrants into the Arctic); Beaufort, Alaska (proxy for the West North American Arctic);  
344 East Canadian Arctic with the southern distribution delimited using the 10°C air temperature  
345 isotherm for July (Cambridge Bay, Nunavut, through to Nain, Labrador); Northwest Atlantic  
346 (Makkovik, Labrador, and southwards, including the Canadian Atlantic provinces and New  
347 England States, USA); Northeast Atlantic (Europe; Fig. 2). The Northwest Pacific was excluded  
348 given the paucity of data. Species generally corresponded to Barcode Index Numbers (BINs), a  
349 binning system provided through BOLD which utilizes a fluid threshold to proxy species units  
350 based on levels of intra- and inter-specific genetic variation (31). Species were included in  
351 genetic analyses provided they featured in at least one Arctic region for which  $\geq 10$  individuals  
352 were sampled. Out of 109 species sampled with Arctic populations, we analysed 26 (Fig. S1), five  
353 of which had sequence data from multiple markers, for a total of 31 species-marker  
354 combinations. All 109 species were considered in additional analyses evaluating total diversity  
355 levels in the Arctic, which were used to quantify the number of Arctic endemic species. These  
356 analyses are presented as supplementary material, and include accumulation curves of all  
357 genotypes sampled (32; Fig. S2), a table interpreting haplotype patterns in all 109 species  
358 sampled (Table S1), and haplotype maps and networks (Figs. S3-S95).

359  
360 Various populations statistics were calculated for each region, including measures of  
361 genetic diversity, genetic differentiation, and Tajima's D test for neutrality. Sequences were  
362 truncated to the shortest length sequence within each species prior to all genetic analyses.  
363 GenAlEx 6.51 (33) was used to run an Analysis of Molecular Variance (AMOVA) and derive  
364 values of  $\Phi_{ST}$  ( $\Phi_{ST}$ ), an analogue to  $F_{ST}$  that incorporates nucleotide diversity in distance  
365 calculations (i.e. haplotypes are not assumed to be equidistant from each other). Calculations for  
366  $\Phi_{ST}$  followed that of Miermans (34). Pairwise tests for significant  $\Phi_{ST}$  values were conducted  
367 using 9999 permutations of the dataset. Null values for  $\Phi_{ST}$  occurred wherein two populations  
368 were monotypic for the same haplotype and were changed to 0 (no genetic differentiation).  
369 Species specific analyses are presented in Table S5.  $\Phi_{ST}$  values were averaged for each region  
370 across all species, and a Principal Coordinates Analysis (PCoA) was conducted on the pairwise  
371 distance matrix using the covariance-standardized method in GenAlEx. Given notably few  
372 measurements were available between the Northeast Pacific and the Beaufort (only two species  
373 with 2-7 records from the Beaufort, and no genetic differentiation), we "normalized" this  
374 pairwise distance by taking the average of genetic distances between the Northeast Pacific and  
375 Nome, and the Northeast Pacific and the East Arctic. The unaltered PCoA figure is presented in  
376 Figure S96. We also conducted the same analysis with low sample size populations removed  
377 ( $< 10$  individuals; Fig. S97). Alternate PCoAs revealed the same pattern, except the Beaufort  
378 grouped closer to the Northeast Pacific when not "normalized."

379  
380 Frequency based parameters were also calculated for each region within each species,  
381 including the number of haplotypes ( $N_a$ ), the number of effective alleles ( $N_e$ ), the number of  
382 private haplotypes within populations ( $N_{PH}$ ), and haplotype diversity ( $h$ ). Ambiguous sites were  
383 removed for these calculations. DnaSP v6 (35) was also used to calculate the number of  
384 polymorphic sites, nucleotide diversity ( $\theta_\pi$ ), and Tajima's D statistic with accompanying  $p$ -  
385 values. These results were again averaged across all species-marker combinations, and  
386 differences in measures between populations were assessed using Kruskal-Wallis H tests (36).

387 Dunn's post hoc tests with Bonferroni corrections were performed for variables yielding  
388 significant Kruskal-Wallis H tests. The analyses for individual species are presented in Table S3,  
389 and the post hoc tests are presented in Table S2.

390

### 391 *Hindcasting species distributions*

392 The distribution of marine forests during the Last Glacial Maximum was inferred using  
393 ecological niche modelling. Modern and paleo marine environmental data layers were  
394 downloaded from MARSPEC (37, 38), in particular, bathymetry, mean annual sea surface  
395 temperatures (SST) and SST of the coldest ice-free month. Seaweed distributions are highly  
396 tuned to marine isotherms, and ecological niche modelling consistently indicate SST is the most  
397 important variable in modelling macroalgal species distributions (2). Paleo environmental data  
398 layers represent average values as derived from six coupled ocean atmosphere general circulation  
399 climatic models, including salinity-adjusted CCSM3. Occurrence records were gathered for  
400 *Odonthalia dentata* and *Laminaria solidungula*. These species were selected to proxy  
401 distributions in boreal to temperate species with Arctic populations (i.e. the classical view of  
402 Arctic marine forests; *O. dentata*), and putative Arctic endemic species (*L. solidungula*). These  
403 species were also selected given they are reliably distinguished morphologically, and as such,  
404 historical records would not be conflated by cryptic species. Occurrence records were derived  
405 from Lüning (6). Distribution maps were scanned and georeferenced, and GPS locations for  
406 occurrences were subsequently derived. For continuous distributions, GPS coordinates were  
407 haphazardly recorded at approximately 250 km intervals. Historical occurrence records were  
408 then pooled with locations from DNA barcode records (BOLD), and the Macroalgal Herbarium  
409 Portal (<https://macroalgae.org/portal/index.php>). To correct for sampling bias during training of  
410 the ecological niche models, occurrence records in close proximity to each other were randomly  
411 removed using the R package spThin (39), with a thinning parameter of 100 kms. The resulting  
412 datasets kept 111/260 occurrence records for *Odonthalia dentata*, and 87/164 for *Laminaria*  
413 *solidungula* (FigShare: <https://doi.org/10.6084/m9.figshare.11301929.v1>). The thinned  
414 occurrence records and environmental layers were then trained using Maxent (40) and projected  
415 onto conditions during the LGM. Models were built using threshold features in order to better  
416 reflect lethal temperature limits in macroalgae, and model performance was assessed using cross  
417 validation. A regularization multiplier of 1 was used, as was a default prevalence of 0.5 (the  
418 probability of presence at average presence locations). Clamping was used to restrict variables  
419 outside the training range. Multivariate Environmental Similarity Surfaces (MESS) were also  
420 used to evaluate the distribution of environmental values outside the training data range  
421 projected during the LGM, which functioned to indirectly map persistent ice cover and restrict  
422 inferences of refugial locations to seasonally ice-free waters. Output asc files were converted to  
423 figures in R using ggmap and ggplot2 packages (39).

424

### 425 **References and Notes**

- 426 1. G. H. Miller, J. Brigham-Grette, R. B. Alley, L. Anderson, H. A. Bauch, M. S. V. Douglas, M.  
427 E. Edwards, S. A. Elias, B. P. Finney, J. J. Fitzpatrick, S. V. Funder, T. D. Herbert, L. D.  
428 Hinzman, D. S. Kaufman, G. M. MacDonald, L. Polyak, A. Robock, M. C. Serreze, J. P.  
429 Smol, R. Spielhagen, J. W. C. White, A. P. Wolfe, E. W. Wolff, Temperature and  
430 precipitation history of the Arctic. *Quaternary Sciences Reviews*. **29**, 1679–1715 (2010).  
431 2. J. Assis, M. B. Araújo, E. A. Serrão, Projected climate changes threaten ancient refugia of  
432 kelp forests in the North Atlantic. *Glob. Change Biol.*, **24**, e55-e66 (2018).

- 433 3. E. Small, Kelps: the key to sustainable harvest of marine biodiversity. *Biodiversity*, **19**, 1-13  
434 (2018).
- 435 4. D. Krause-Jensen, P. Lavery, O. Serrabi, N. Marbà, P. Masque, C. M. Duarte, Sequestration of  
436 macroalgal carbon: the elephant in the Blue Carbon room. *Biol. Letters*, **14**, 20180236  
437 (2018).
- 438 5. O. Hoegh-Gulberg, K. Caldeira, T. Chopin, S. Gaines, P. Haugan, M. Hemer, J. Howard, M.  
439 Konar, D. Krause-Jensen, E. Lindstad, C. E. Lovelock, M. Michelin, F. G. Nielsen, E.  
440 Northrop, R. Parker, J. Roy, T. Smith, S. Some, P. Tyedmers, *The Ocean as a Solution to*  
441 *Climate Change: Five Opportunities for Action* (World Resources Institute, Washington,  
442 DC, 2019).
- 443 6. K. Lüning, *Seaweeds: Their Environment, Biogeography, and Ecophysiology* (Wiley, New  
444 York, 1990).
- 445 7. D. Krause-Jensen, M. K. Sejr, A. Bruhn, M. B. Rasmussen, P. B. Christensen, J. L. S. Hansen,  
446 C. M. Duarte, G. Bruntse, S. Wegeberg, Deep penetration of kelps offshore along the west  
447 coast of Greenland. *Front. Mar. Sci.*, **6**, 1-7 (2019).
- 448 8. K. H. Dunton, D. M. Schell, Seasonal carbon budget and growth of *Laminaria solidungula* in  
449 the Alaskan High Arctic. *Mar. Ecol. Prog. Ser.*, **31**, 57-66 (1986).
- 450 9. R. K. S. Lee, General ecology of the Canadian Arctic benthic marine algae. *ARCTIC*, **26**,  
451 32-43 (1973).
- 452 10. K. H. Dunton, Arctic biogeography: The paradox of the marine benthic fauna and flora.  
453 *Trends Ecol. Evol.*, **7**, 183-189 (1992).
- 454 11. G. W. Saunders, D. C. McDevit, DNA barcoding unmask overlooked diversity improving  
455 knowledge on the composition and origins of the Churchill algal flora. *BMC Ecol.*, **13**, 1-23  
456 (2013).
- 457 12. J. Neiva, C. Paulino, M. M. Nielsen, D. Krause-Jensen, G. W. Saunders, J. Assis, I. Bárbara,  
458 É. Tamigneaux, L. Gouveia, T. Aires, N. Marbà, A. Bruhn, G. A. Pearson, E. A. Serrão,  
459 Glacial vicariance drives phylogeographic diversification in the amphi-boreal kelp  
460 *Saccharina latissima*. *Sci. Rep.*, **8**, 1-12 (2018).
- 461 13. W. H. Adey, S. C. Lindstrom, M. H. Hommersand, K. M. Müller, The biogeographic origin  
462 of Arctic endemic seaweeds: a thermogeographic view. *J. Phycol.*, **44**, 1384-1394 (2008).
- 463 14. H. D. Laughinghouse, K. M. Müller, W. H. Adey, Y. Lara, R. Young, G. Johnson, Evolution  
464 of the Northern Rockweed, *Fucus distichus*, in a regime of glacial cycling: implications for  
465 benthic algal phylogenetics. *PLOS ONE*, **10**, e0143795 (2015).
- 466 15. F. C. Küpper, A. F. Peters, D. M. Shewring, M. D. J. Sayer, A. Mystikou, H. Brown, E.  
467 Azzopardi, O. Dargent, M. Strittmatter, D. Brennan, A. O. Asensi, P. van West, R. T. Wilce  
468 Arctic marine phytobenthos of northern Baffin Island. *J. Phycol.*, **52**, 532-549 (2016).
- 469 16. J. P. Wares, C. W. Cunningham Phylogeography and historical ecology of the North Atlantic  
470 intertidal. *Evolution*, **55**, 2455-2469, (2001).
- 471 17. C. A. Maggs, R. Castilho, D. Foltz, C. Henzler, M. T. Jolly, J. Kelly, J. Olsen, K. E. Perez,  
472 W. Stam, R. Väinölä, F. Viard, J. Wares, Evaluating signatures of glacial refugia for North  
473 Atlantic benthic marine taxa. *Ecology*, **89**, S108-S122 (2008).
- 474 18. T. T. Bringloe, G. W. Saunders, Mitochondrial DNA sequence data reveal the origins of  
475 postglacial marine macroalgal flora in the Northwest Atlantic. *Mar. Ecol. Prog. Ser.*, **589**,  
476 45-58 (2018).

- 477 19. A. Wulff, K. Iken, M. L. Quartino, A. Al-Handal, C. Wiencke, M. N. Clayton, Biodiversity,  
478 biogeography and zonation of marine benthic micro- and macroalgae in the Arctic and  
479 Antarctic. *Bot. Mar.*, **52**, 491-507 (2009).
- 480 20. U. Pflaumann, M. Sarnthein, M. Chapman, L. d'Abreu, B. Funnell, M. Huels, T. Kiefer, M.  
481 Maslin, H. Shultz, J. Swallows, S. van Kreveld, M. Vautravers, E. Vogelsang, M. Weinelt,  
482 Glacial North Atlantic: Sea-surface conditions reconstructed by GLAMAP 2000.  
483 *Paleoceanography*, **18**, 1-21 (2003).
- 484 21. R. T. Wilce, The “Arctic Stamp”, its imprint on endangered marine flora. *Pers. Phycol.*, **3**,  
485 155-180 (2016).
- 486 22. M. Guiry, G. Guiry, *AlgaeBase*. (<http://www.algaebase.org>, 2020).
- 487 23. S. M. Hardy, C. M. Carr, M. Hardman, D. Steinke, E. Corstorphine, C. Mah, Biodiversity  
488 and phylogeography of Arctic marine fauna: insights from molecular tools. *Mar. Biodivers.*,  
489 **41**, 195-210 (2011).
- 490 24. C. M. Carr, S. M. Hardy, T. M. Brown, T. A. MacDonald, P. D. N. Hebert, A tri-oceanic  
491 perspective: DNA barcoding reveals geographic structure and cryptic diversity in Canadian  
492 polychaetes. *PLOS ONE*, **6**, e22232 (2011).
- 493 25. K. K. S. Layton, A. L. Martel, P. D. N. Hebert, Patterns of DNA barcode variation in  
494 Canadian marine molluscs. *PLOS ONE*, **9**, e95003 (2014).
- 495 26. A. Tempestini, S. Rysgaard, F. Dufresne, Species identification and connectivity of marine  
496 amphipods in Canada’s three oceans. *PLOS ONE*, **13**, e0197174 (2018).
- 497 27. R. S. Bradley, J. H. England, The Younger Dryas and the Sea of Ancient Ice. *Quaternary*  
498 *Research*, **70**, 1–10 (2008).
- 499 28. M. Christine, Marine Ecosystems, In *Arctic Biodiversity Assessment: Status and Trends in*  
500 *Arctic Biodiversity* (Narayana Press, Denmark, 2013).
- 501 29. J. Neiva, G. A. Pearson, M. Valero, E. A. Serrão, Fine-scale genetic breaks driven by  
502 historical range dynamics and ongoing density-barrier effects in the estuarine seaweed  
503 *Fucus ceranoides* L. *BMC Evol. Biol.*, **12**, e78 (2012).
- 504 30. M. Kearse, R. Moir, A. Wilson, S. Stones-Havas, M. Cheung, S. Sturrock, S. Buxton, A.  
505 Cooper, S. Markowitz, C. Duran, T. Thierer, B. Ashton, P. Meintjes, A. Drummond,  
506 Geneious Basic: An integrated and extendable desktop software platform for the  
507 organization and analysis of sequence data. *Bioinformatics*, **28**, 1647–1649 (2012).
- 508 31. S. Ratnasingham, P. D. N. Hebert, A DNA-based registry for all animal species: the Barcode  
509 Index Number (BIN) system. *PLOS ONE*, **8**, e66312 (2013).
- 510 32. R. K. Colwell, *EstimateS: Statistical estimation of species richness and shared species from*  
511 *samples* (User’s Guide, 2013).
- 512 33. R. Peakall, P. E. Smouse, GenAlEx 6.5: genetic analysis in Excel. Population genetic  
513 software for teaching and research-an update. *Bioinformatics*, **28**, 2537-2539 (2012).
- 514 34. P. G. Miermans, Using the AMOVA framework to estimate a standardized genetic  
515 differentiation measure. *Evolution*, **60**, 2399-2402 (2006).
- 516 35. J. Rozas, A. Ferrer-Mata, J. C. Sánchez-DelBarrio, S. Guirao-Rico, P. Librado, S. E. Ramos-  
517 Onsins, A. Sánchez-Gracia, DnaSP 6: DNA sequence polymorphism analysis of large  
518 datasets. *Mol. Biol. Evol.*, **34**, 3299-3302 (2017).
- 519 36. IBM Corporation, *IBM SPSS Statistics for Windows v25.0*. (IBM Corp., Armonk, NY, 2017)
- 520 37. E. J. Sbrocco, P. H. Barber, MARSPEC: ocean climate layers for marine spatial ecology.  
521 *Ecology*, **94**, 979 (2013).



- 522 38. E. J. Sbrocco, Paleo-MARSPEC: gridded ocean climate layers for the Mid-Holocene and  
523 Last Glacial Maximum. *Ecology*, **95**, 1710 (2014).  
524 39. R Core Team, *R: A language and environment for statistical computing*. R Foundation for  
525 Statistical Computing (<https://www.R-project.org/>, Vienna, Austria, 2019)  
526 40. S. J. Phillips, M. Dudík, Modelling of species distributions with Maxent: new extensions and  
527 a comprehensive evaluation. *Ecography*, **31**, 161-175 (2008).

## 528 529 **Acknowledgments**

530 We thank the many people who facilitated the collection of specimens: Dr. Meghann Bruce, Dr.  
531 Kyatt Dixon, Kirby Morrill, Dr. Amanda Savoie; Dr. Kenneth Dunton at the University of Texas  
532 for facilitating our sampling in the Beaufort (Northern Alaska); Dr. Yotsukura Norishige at  
533 Hokkaido University for providing collections from Hokkaido; Dr. Kjersti Sjøtun at the  
534 University of Bergen for facilitating our sampling in Norway; Don Stiles and James Horner for  
535 facilitating the collection of samples in Nome, Alaska; Laura Borden for providing collections  
536 from Cambridge Bay (Nunavut); Drs. Selivanova and Zhigadlova for providing specimens from  
537 Kamchatka (Russia). We thank those who helped generate COI-5P data, particularly Tanya  
538 Moore, as well as Alex Geoffroy and Line Le Gall for providing trace files. Drs. Jorge Assis and  
539 Ester Serrão provided critical feedback regarding analyses. Dr. Jason Addison also provided  
540 critical input leading to the inception of this manuscript. This project was funded by the Northern  
541 Scientific Training Program, the Natural Sciences & Engineering Research Council of Canada  
542 through an NSERC Post-Graduate Scholarship to T.T. Bringloe and a Discovery Grant to G.W.  
543 Saunders (170151-2013), the New Brunswick Innovation Foundation, and the University of  
544 Melbourne McKenzie Postdoctoral Fellowship program.

## 545 546 **Figures Legends**

547 **Fig. 1. Principal Coordinates Analysis results for genetic distances between the sampled**  
548 **regions.** Genetic distances are inferred from 31 species-marker combinations. Positive and  
549 negative symbols represent the distributions of coordinates with  $\pm$ SE.

550  
551 **Fig. 2. Present day and Last Glacial Maximum distributions of Arctic marine forest**  
552 **species.** Endemic species are proxied by the kelp *Laminaria solidungula*, and cold-temperate  
553 species ranging into the Arctic are proxied by the red alga *Odonthalia dentata*. The heatmap  
554 represents relative probability of occurrence amongst global marine locations as proxied by mean  
555 annual sea surface temperatures and temperatures of the coldest ice-free month. Light grey areas  
556 represent persistent ice cover during the LGM.

557



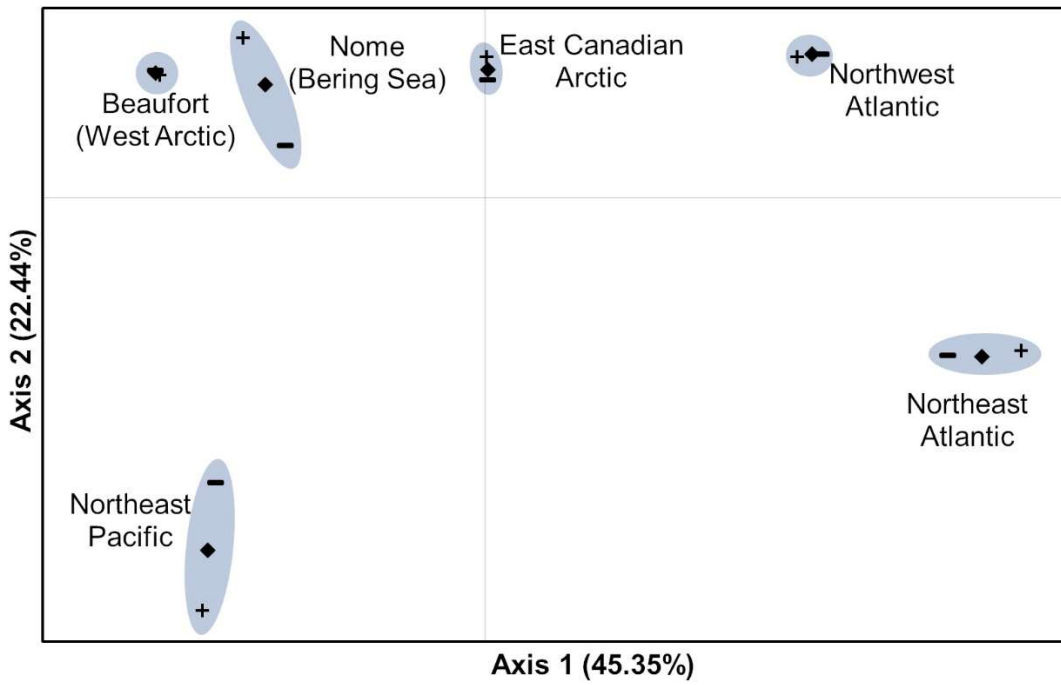

558  
559

**Fig. 1**

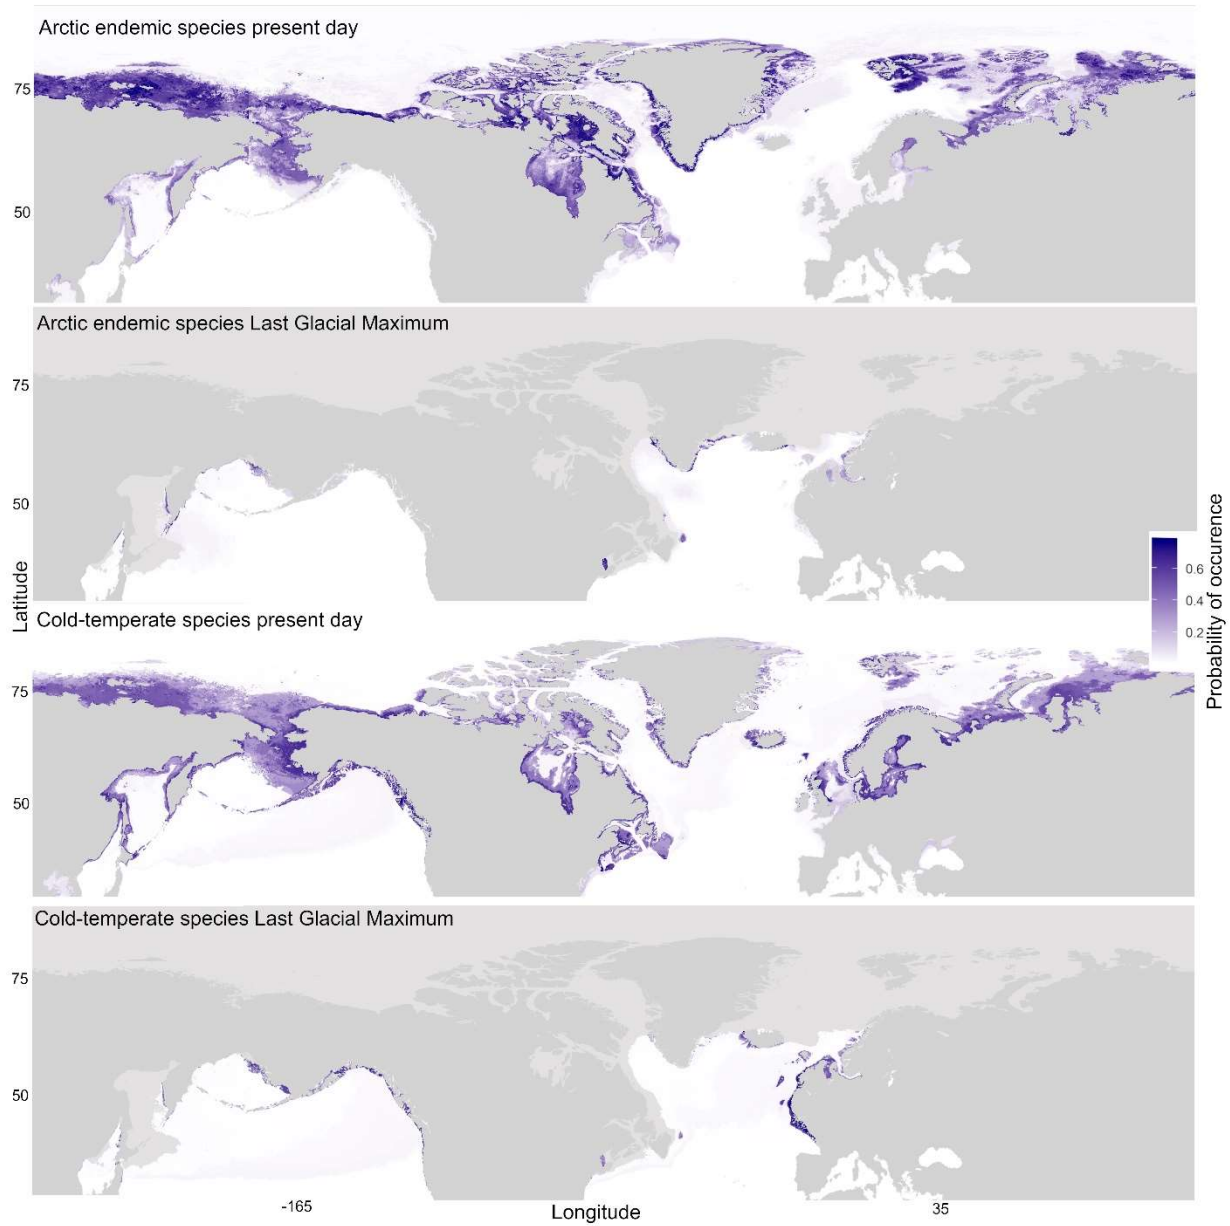

562 **Table 1. Genetic distances ( $\Phi_{ST}$ ) between pairwise populations in 26 species of marine**  
 563 **macroalgae with Arctic populations.** Genetic distances were evaluated based on four genetic  
 564 markers (COI-5P, *tufA*, ITS, *ycf35*). Note, the pairwise value between Beaufort and the Northeast  
 565 Pacific was “normalized” by taking the average of genetic distances between Nome and the NE  
 566 Pacific, and the East Arctic and NE Pacific. Sample sizes for pairwise distances are in the top  
 567 right corner of the table. SE for genetic distances are indicated in brackets.

|                           | <b>Northeast Pacific</b> | <b>Nome, Alaska</b> | <b>Beaufort, Alaska</b> | <b>East Arctic</b> | <b>Northwest Atlantic</b> | <b>Northeast Atlantic</b> |
|---------------------------|--------------------------|---------------------|-------------------------|--------------------|---------------------------|---------------------------|
| <b>Northeast Pacific</b>  | -                        | 6                   | -                       | 8                  | 8                         | 4                         |
| <b>Nome, Alaska</b>       | 0.438(0.158)             | -                   | 11                      | 20                 | 17                        | 5                         |
| <b>Beaufort, Alaska</b>   | 0.471(0.141)             | 0.251(0.089)        | -                       | 15                 | 12                        | 5                         |
| <b>East Arctic</b>        | 0.503(0.124)             | 0.300(0.059)        | 0.338(0.090)            | -                  | 27                        | 11                        |
| <b>Northwest Atlantic</b> | 0.751(0.101)             | 0.518(0.085)        | 0.675(0.089)            | 0.347(0.063)       | -                         | 11                        |
| <b>Northeast Atlantic</b> | 0.822(0.141)             | 0.741(0.149)        | 0.867(0.086)            | 0.539(0.109)       | 0.437(0.131)              | -                         |

568

**Table 2. Summary statistics for populations of Arctic marine macroalgae with Arctic**

**populations.**  $n$  = sample size (number of species),  $bp$  = number of basepairs,  $N_{poly}$  = number of polymorphic nucleotide sites,  $N_a$  = number of haplotypes,  $N_e$  = number of effective alleles,  $N_{PH}$  = number of private haplotypes,  $h$  = haplotype diversity,  $\theta_\pi$  = nucleotide diversity,  $D$  = Tajima's test for neutrality,  $p$  = Kruskal-Wallis tests for independent distributions of values (Dunn's post hoc tests with Bonferroni correction did not detect significant pairwise differences); NE=Northeast, NW=Northwest. Note sample sizes from NE Pacific to NE Atlantic in  $N_{PH}$  are 10, 20, 16, 31, 29, 13, and from NE Pacific to Overall in  $D$ , 6, 15, 5, 23, 19, 5, 31. Values for 1 SE are presented below values for each variable.

| Location     | NE Pacific           | Nome                 | Beaufort             | East Arctic          | NW Atlantic          | NE Atlantic          | Overall              | $p$          |
|--------------|----------------------|----------------------|----------------------|----------------------|----------------------|----------------------|----------------------|--------------|
| $n$          | 8                    | 20                   | 15                   | 31                   | 27                   | 11                   | 31                   |              |
| $bp$         | 649                  | 639                  | 625                  | 631                  | 632                  | 593                  | 631                  |              |
| $N_{poly}$   | 5.375<br>2.187       | 1.600<br>0.461       | 1.000<br>0.390       | 4.387<br>0.931       | 4.444<br>0.894       | 1.727<br>0.740       | 9.516<br>1.433       | <b>0.021</b> |
| $N_a$        | 4.000<br>1.102       | 2.300<br>0.242       | 1.933<br>0.330       | 2.935<br>0.321       | 4.148<br>0.574       | 2.273<br>0.702       | 8.097<br>0.995       | <b>0.041</b> |
| $N_e$        | 1.782<br>0.334       | 1.542<br>0.115       | 1.312<br>0.136       | 1.753<br>0.141       | 1.821<br>0.192       | 1.474<br>0.248       | 2.834<br>0.265       | 0.157        |
| $N_{PH}$     | 2.500<br>0.806       | 1.000<br>0.218       | 0.625<br>0.202       | 1.323<br>0.287       | 2.655<br>0.526       | 1.538<br>0.656       | -                    | <b>0.035</b> |
| $h$          | 0.32325<br>0.09617   | 0.29515<br>0.04919   | 0.14760<br>0.05954   | 0.32958<br>0.04680   | 0.32674<br>0.05140   | 0.20782<br>0.07419   | 0.53132<br>0.04820   | 0.143        |
| $\theta_\pi$ | 0.001544<br>0.000794 | 0.000744<br>0.000268 | 0.000399<br>0.000181 | 0.001873<br>0.000407 | 0.001383<br>0.000569 | 0.000852<br>0.000345 | 0.002605<br>0.000395 | 0.093        |
| $D$          | -1.19122<br>0.35562  | -0.02702<br>0.29170  | 0.01276<br>0.44359   | -0.00114<br>0.28512  | -1.06532<br>0.21389  | -0.60136<br>0.53250  | -0.25835<br>0.21314  | <b>0.012</b> |

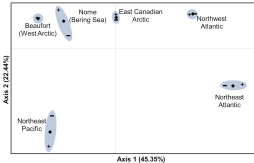



Arctic endemic species present day

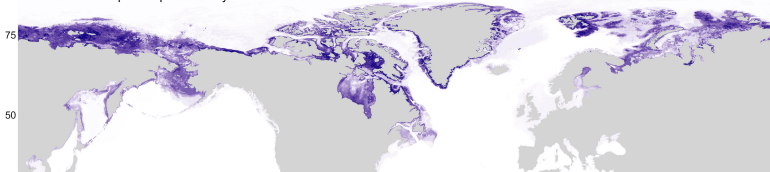

Arctic endemic species Last Glacial Maximum

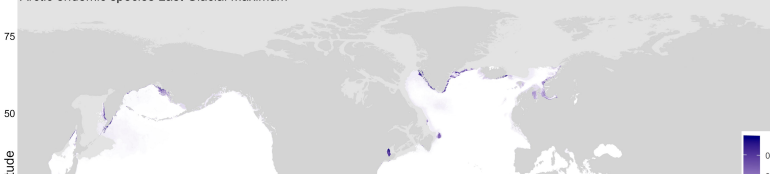

Cold-temperate species present day

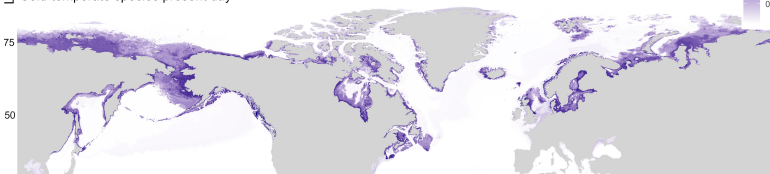

Cold-temperate species Last Glacial Maximum

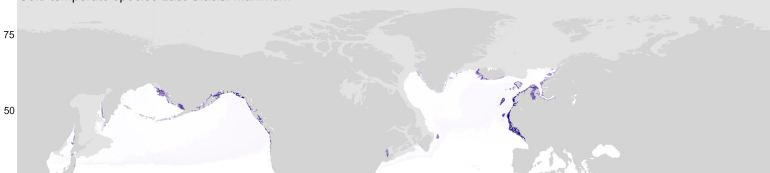

Probability of occurrence

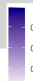

Latitude

75  
50

-165

Longitude

35
